# Supplementary material for: The Integrated Stress Response Is Tumorigenic and Constitutes a Therapeutic Liability in Somatotroph Adenomas
Source: MDPI journal article supplement (doi:10.3390/ijms232113067), 2022-10-28
Supplement: s1 [file s1]

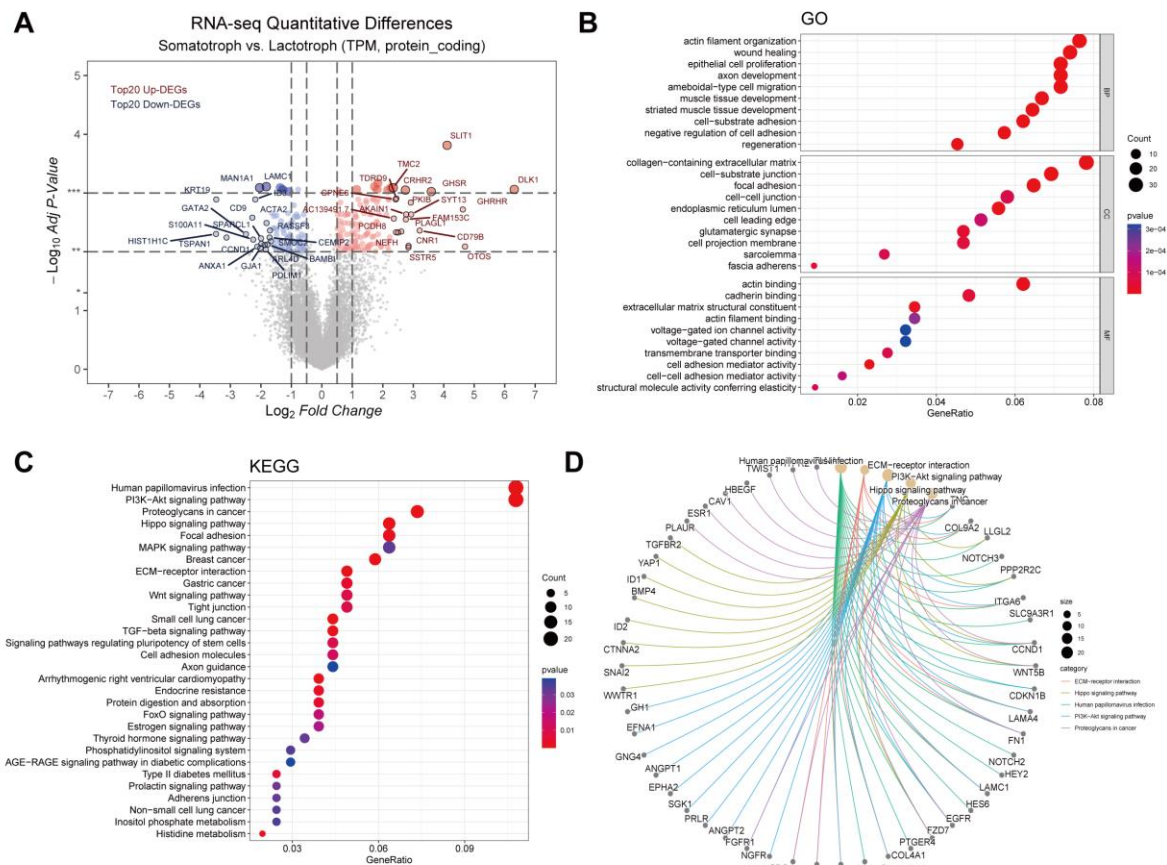

**Figure S1.** Transcriptome analysis of somatotroph and lactotroph adenomas. A: Volcano map of differentially expressed proteins. B: The most enriched GO terms. CD: KEGG pathway analysis based on DEGs.

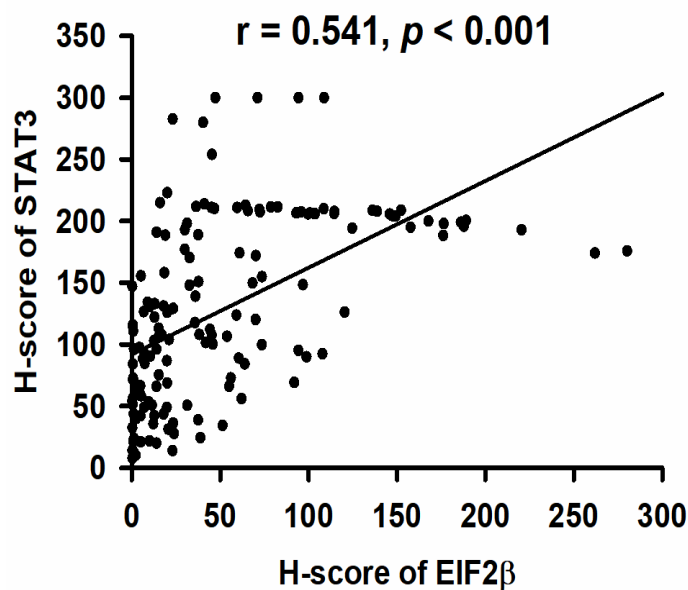

**Figure S2.** Correlation between EIF2 $\beta$  H-score and STAT3 H-score in patients with pituitary adenomas.
